# Supplementary material
Source: PubMed Central journal article supplement (PMC6369764)
Supplement: pnas.1812407116.sapp.pdf [file pnas.1812407116.sapp.pdf]

# Supplemental Information for

Dicer functions transcriptionally and post-transcriptionally in a multilayer antiviral defense

Ida Bagus Andika, Hideki Kondo, and Nobuhiro Suzuki‡

Institute of Plant Science and Resources, Okayama University, Kurashiki, Okayama 710-0046, Japan

‡Corresponding Author: Nobuhiro Suzuki  
Agrivirology Laboratory  
Institute of Plant Science and Resources  
Okayama University  
Kurashiki, Okayama 710-0046, Japan  
Tel. 81(86) 434-1230  
Fax. 81(86) 434-1232  
e-mail. [nsuzuki@okayama-u.ac.jp](mailto:nsuzuki@okayama-u.ac.jp)

## This PDF file includes:

Tables S1 and S2

Figures S1 to S13

## Supplementary tables

Table S1. List of the virus-induced gene candidates.

| Transcript/protein ID | putative gene name | RPKM        |                | DK80 vs. DK80+CHV1dp69 |         | RPKM            |             | DK80 vs. dsGF73+dsGF73+CHV1dp69 |                                          | Annotations                                                  | ASPECT/KOG GROUP (interpro domain) |
|-----------------------|--------------------|-------------|----------------|------------------------|---------|-----------------|-------------|---------------------------------|------------------------------------------|--------------------------------------------------------------|------------------------------------|
|                       |                    | DK80        | DK80+CHV1dp69* | Fold change**          | P-value | dsGF73+CHV1dp69 | Fold change | P-value                         |                                          |                                                              |                                    |
| ig Crypa2 65641       | <i>gtpch</i>       | 5.332408582 | 1120.799266    | 194.9402722            | 0       | 21.02372269     | 3.136832771 | 0                               | GTP cyclohydrolase I                     | coenzyme transport and metabolism                            |                                    |
| ig Crypa2 287505      | <i>aprt</i>        | 4.161352251 | 451.4977753    | 100.7095053            | 0       | 7.70262467      | 1.47366059  | 3.0927E-05                      | adenine phosphoribosyl transferases      | nucleotide transport and metabolism                          |                                    |
| ig Crypa2 327914      | <i>hp1</i>         | 14.42890657 | 1180.504224    | 75.91892189            | 0       | 133.0644753     | 7.339470286 | 0                               | hypothetical protein 1                   | unknown                                                      |                                    |
| ig Crypa2 231469      | *                  | 2.714999582 | 209.9140978    | 71.70990903            | 0       | 3.466758459     | 1.016464982 | 0.90947014                      | D-3-phosphoglycerate dehydrogenase       | amino acid transport and metabolism                          |                                    |
| ig Crypa2 333449      | *                  | 3.731814731 | 236.1750779    | 58.73127293            | 0       | 21.70874288     | 4.630172349 | 0                               | LRR-containing protein                   | function unknown, protein binding (LRR_1, PNI-like)          |                                    |
| ig Crypa2 349858      | <i>uprt</i>        | 32.81901896 | 1577.477377    | 44.62255222            | 0       | 231.0995153     | 5.606492658 | 0                               | uracil phosphoribosyltransferase ?       | unknown (P-loop containing NTH, PRTase-like, HAD-like)       |                                    |
| ig Crypa2 16211       | <i>btb</i>         | 2.433048838 | 103.3445266    | 39.36805506            | 0       | 8.4305625       | 8.4305625   | 0                               | SKP1/BTB/POZ_sf                          | protein binding (POZ)                                        |                                    |
| ig Crypa2 257472      | <i>hel</i>         | 1.384241578 | 44.16869213    | 29.61160782            | 0       | 3.054498028     | 1.756555807 | 8.35E-08                        | Predicted helicase, DEAD-box superfamily | general function prediction only                             |                                    |
| ig Crypa2 252931      | *                  | 3.056317516 | 88.45990338    | 26.85229               | 0       | 7.762717607     | 2.021432138 | 3.4344E-09                      | Cytochrome P450 subfamilies              | secondary metabolites biosynthesis, transport and catabolism |                                    |
| ig Crypa2 67680       | *                  | 4.820448367 | 127.8252821    | 24.60964099            | 0       | 22.92641285     | 3.78574851  | 0                               | hypothetical protein                     | unknown                                                      |                                    |
| ig Crypa2 44705       | *                  | 6.321075402 | 116.1071998    | 17.04015267            | 0       | 12.40375556     | 1.561796097 | 0.00040877                      | GCN5-related N-acetyltransferase         | metabolism                                                   |                                    |
| ig Crypa2 355436      | *                  | 17.59281467 | 301.299682     | 15.89784129            | 0       | 7.369204131     | 0.333582595 | 0                               | Peptidase G1, eiqolisin                  | proteolysis and peptidolysis                                 |                                    |
| ig Crypa2 356052      | <i>hp2</i>         | 943.4194333 | 14518.12877    | 14.28688951            | 0       | 873.6288954     | 0.737317277 | 0.00012427                      | hypothetical protein 2                   | unknown                                                      |                                    |
| ig Crypa2 354844      | *                  | 2.801971856 | 39.96910382    | 13.23442345            | 0       | 3.375650753     | 0.959120331 | 0.748103                        | S1/P1 nuclease                           | DNA catabolism                                               |                                    |
| ig Crypa2 358414      | *                  | 19.54377547 | 271.4143457    | 12.89089268            | 0       | 16.19007663     | 0.65961299  | 2.1849E-05                      | hypothetical protein                     | unknown                                                      |                                    |
| ig Crypa2 327709      | *                  | 4.844512613 | 65.93782659    | 12.63175413            | 0       | 8.180847243     | 1.344350495 | 0.00508909                      | Cytochrome P450 subfamilies              | secondary metabolites biosynthesis, transport and catabolism |                                    |
| ig Crypa2 68851       | <i>ac</i>          | 4.585334308 | 57.15889248    | 11.56470824            | 0       | 5.368636923     | 0.932128499 | 0.6004684                       | Adenylate cyclase                        | cAMP biosynthesis                                            |                                    |
| ig Crypa2 266713      | *                  | 14.59178473 | 174.3474755    | 11.08903326            | 0       | 93.62564504     | 5.107205576 | 0                               | GCN5-related N-acetyltransferase         | metabolism                                                   |                                    |
| ig Crypa2 219629      | *                  | 11.17087614 | 126.7156612    | 10.52832653            | 0       | 26.96888225     | 1.921908641 | 2.4649E-11                      | AAA+-type ATPase                         | posttranslational modification, protein turnover, chaperones |                                    |
| ig Crypa2 348724      | *                  | 9.593154076 | 108.1374819    | 10.46345331            | 0       | 3.77794145      | 0.313652804 | 0                               | Purple acid phosphatase                  | carbohydrate transport and metabolism                        |                                    |

\*RPKM(Reads Per Killobases per Million)>30

Table S2. List of the primers used in this study

| Name                    | Sequence (5`-3`)                               | Direction | Used for            |
|-------------------------|------------------------------------------------|-----------|---------------------|
| CP-Actin (F)            | GACCCAGATCGTCTTCGAGACG                         | Forward   | RT-PCR actin        |
| CP-Actin (R)            | CGCACTTCATGATGGAGTTAAA                         | Reverse   | RT-PCR actin        |
| GTPcyclo (f)            | CAAGGTGCTGTGCGAACTCT                           | Forward   | RT-PCR gtp          |
| GTPcyclo (r)            | GCTCATATCAACGAGCTTGA                           | Reverse   | RT-PCR gtp          |
| Adeninephospho (f)      | GCTACTCTCGGCACTCTAAA                           | Forward   | RT-PCR aprt         |
| Adeninephospho (r)      | TGAAAGGAGCAAAGCAGTCC                           | Reverse   | RT-PCR aprt         |
| Unk327914 (f)           | AGCAAGGCAAGCAGCAGCGAT                          | Forward   | RT-PCR 27914        |
| Unk327914 (r)           | AAACTTGGACTTCATCCAGC                           | Reverse   | RT-PCR 27914        |
| D3phospho (f)           | CACAGCCACCCACGAGGTCA                           | Forward   | RT-PCR D3           |
| D3phospho (r)           | GTGTCGTTTGGTGATAGCCG                           | Reverse   | RT-PCR D3           |
| LRR (f)                 | TCGTTCCCGACCCAAGAAAT                           | Forward   | RT-PCR lrr          |
| LRR (r)                 | GGCGGATGTGGGTGTTGGAC                           | Reverse   | RT-PCR lrr          |
| P-loop (f)              | GGTGCTCTCGTCAACACCT                            | Forward   | RT-PCR uprt         |
| P-loop (r)              | CCAGCACCGTCTCCAGGTCT                           | Reverse   | RT-PCR uprt         |
| BTB-POZ (f)             | TCGTCAAAGCACCTTACTGT                           | Forward   | RT-PCR btb          |
| BTB-POZ (r)             | GGTGTCCAAAATCAATGAT                            | Reverse   | RT-PCR btb          |
| Helicase (f)            | ACGCCAAGACCTTTGGCTCA                           | Forward   | RT-PCR helicase     |
| Helicase (r)            | TCGAGACAGTGGCAATCTCC                           | Reverse   | RT-PCR helica       |
| Cytochrome252931 (f)    | CTGGTGGCAAGATGCGTCTA                           | Forward   | RT-PCR 252931       |
| Cytochrome252931 (r)    | CGCCCTTGAGGAGGTGGCTG                           | Reverse   | RT-PCR 252931       |
| Threonine-serine (f)    | GGATCTGCACCCGAAAAGACC                          | Forward   | RT-PCR Threo\serine |
| Threonine-serine (r)    | TCTCGACAGCAAGCACTTG                            | Reverse   | RT-PCR 252931       |
| Unk-67680 (f)           | GCTCCCAATCAGAATCTTGG                           | Forward   | RT-PCR 67680        |
| Unk-67680 (r)           | TAGCACCTTTTCGTGAAAGT                           | Reverse   | RT-PCR 67680        |
| Purple (f)              | TACACCTCTTGGATATCCT                            | Forward   | RT-PCR Purple       |
| Purple (r)              | GGCTGGCCATGTACACTTTG                           | Reverse   | RT-PCR Purple       |
| Unk-356052 (f)          | AGTGAGAGATGCTGGCCTGG                           | Forward   | RT-PCR 356052       |
| Unk-356052 (r)          | GCATCTGAAGCGGTCTCGTT                           | Reverse   | RT-PCR 356052       |
| S1-P1 (f)               | GCTTCATACCTGCTTCTGAC                           | Forward   | RT-PCR S1-P1        |
| S1-P1 (r)               | TGCAGACGTAGGCATTTGCA                           | Reverse   | RT-PCR S1-P1        |
| Unk-358414 (f)          | ACGGCCCTGAGATGGACCT                            | Forward   | RT-PCR 358414       |
| Unk-358414 (r)          | CAAATGTCCGCAATAGACCG                           | Reverse   | RT-PCR 358414       |
| CytoP450-327709 (f)     | AGCAAGCCGCTAGATATCGT                           | Forward   | RT-PCR 327709       |
| CytoP450-327709 (r)     | CTCGGATCATGGCCGTCCG                            | Reverse   | RT-PCR 327709       |
| Adenylate (f)           | CCGTGCCATCATATCCTAT                            | Forward   | RT-PCR ac           |
| Adenylate (r)           | GTGTAGCAGCTCAGCCTGA                            | Reverse   | RT-PCR ac           |
| AAA (f)                 | TATCAGCTGTACGGCGCGG                            | Forward   | RT-PCR AAA          |
| AAA (r)                 | TGCGTCCGTCGCTAGACAAA                           | Reverse   | RT-PCR AAA          |
| GCN5-rel (f)            | GGCTCCATCACCCACCACC                            | Forward   | RT-PCR GCN5         |
| GCN5-rel (r)            | CAACGCCTTTACCATAATCC                           | Reverse   | RT-PCR GCN5         |
| Threo (f)               | CGCGGCCGACAGGCACCTGC                           | Forward   | RT-PCR 246505       |
| Threo (r)               | TGCTTCGACACCAAATGCG                            | Reverse   | RT-PCR 246505       |
| LRR (f)                 | ACCACGGCGCCCGCCGCATC                           | Forward   | RT-PCR lrr          |
| LRR (r)                 | GTCACCAGGCTGGCGAGGGC                           | Reverse   | RT-PCR lrr          |
| Peptidase (f)           | AAGTACGCCACTGTCGTCGC                           | Forward   | RT-PCR Peptidase G1 |
| Peptidase (r)           | CGGACGAGGTGGTGGCCTCG                           | Reverse   | RT-PCR Peptidase G1 |
| Dcl2-C. parasitica (f)  | CCTGCCCTGTTCAGTATCA                            | Forward   | RT-PCR CpDcl2       |
| Dcl2-C. parasitica (r)  | GTGGTAGCCCTCTCTTTGAC                           | Reverse   | RT-PCR CpDcl2       |
| Dcl2-F. graminearum (f) | TCCTCAAGCGATAAGGTATGG                          | Forward   | RT-PCR FgDcl2       |
| Dcl2-F. graminearum (r) | GAACTTCATCGAAGACGATAAG                         | Reverse   | RT-PCR FgDcl2       |
| Dcl2-R. necratix (f)    | ACTACGAAAGGCTTGAATTC                           | Forward   | RT-PCR RnDcl2       |
| Dcl2-R. necratix (r)    | ATCAAGGATGGGGTCAACCAAG                         | Reverse   | RT-PCR RnDcl2       |
| OL-327914-Neo (f)       | GAATCATCAACGAATCAACAGATACCCAGAGTTATCTCACCAT    | Forward   | Δ327914             |
| OL-327914-Neo (r)       | ACCCAATCTTTCGCGCCCTCATTTCCCGGTGTAGGAAGCTGTT    | Reverse   | Δ327914             |
| 5arm-327914 (f)         | ATAACGACCCGCTCAAGGCTGT                         | Forward   | Δ327914             |
| 5arm-327914 (r)         | TGAGATAACTCTGGGTATCTGGTTGATTTCGTTGATGATTTCGTAC | Reverse   | Δ327914             |
| 3arm-327914 (f)         | GCTTCTACACCGGGGAATGAGGGCCGGCAAGAATGGGTCCGC     | Forward   | Δ327914             |
| 3arm-327914 (r)         | CACAGATTCTTAAGCGTGTGGA                         | Reverse   | Δ327914             |
| OL-GTP-Neo (f)          | ATCTCATTTCCCGCCATAACAAGATACCCAGAGTTATCTCACCAT  | Forward   | Δgtpch              |
| OL-GTP-Neo (r)          | TGCGATAAAGCCGCACTCTATCATTTCCCGGTGTAGGAAGCTGTT  | Reverse   | Δgtpch              |
| 5arm-GTP (f)            | ACCAGTGCAAAGGGAAAGTTTA                         | Forward   | Δgtpch              |

|                       |                                              |         |              |
|-----------------------|----------------------------------------------|---------|--------------|
| 5arm-GTP (r)          | TGAGATAACTCTGGGTATCTTGTATGGCGGAATGAGATGAAA   | Reverse | Δgtpch       |
| 3arm-GTP (f)          | GCTTCTACACCGGGAATGATAGAGTGGCGCTTTATCGCATTTG  | Forward | Δgtpch       |
| 3arm-GTP (r)          | GAAGCCCGGTGAGCACTCTGG                        | Reverse | Δgtpch       |
| OL-Ploop-Neo (f)      | TCTCTACCGATACTGAAGCCAGATACCCAGAGTTATCTCACCAT | Forward | Δuprt        |
| OL-Ploop-Neo (r)      | TGCCATCATTCTCCTCTCTCATTCCCGGTGTAGGAAGCTGTT   | Reverse | Δuprt        |
| 5arm-Ploop (f)        | GAGAGGAAAGGGAATGGGTTG                        | Forward | Δuprt        |
| 5arm-Ploop (r)        | TGAGATAACTCTGGGTATCTGGCTTCAGTATCGGTAGAGAGAT  | Reverse | Δuprt        |
| 3arm-Ploop (f)        | GCTTCTACACCGGGAATGAGAGAGAGAGAATGATGGCAAGAG   | Forward | Δuprt        |
| 3arm-Ploop (r)        | ACACCCCGGCTCTCCAACAAGC                       | Reverse | Δuprt        |
| OL-BTB-Neo (f)        | AGCCCCGAAACAGTTTCAGAAGATACCCAGAGTTATCTCACCAT | Forward | Δbtb         |
| OL-BTB-Neo (r)        | ATCTTGTGTCAGCAGCAGGTTTATTCCCGGTGTAGGAAGCTGTT | Reverse | Δbtb         |
| 5arm-BTB (f)          | AAACAGAGAGTAAAGGGATCT                        | Forward | Δbtb         |
| 5arm-BTB (r)          | TGAGATAACTCTGGGTATCTTCTGAAACTGTTGCGGGCTGCTG  | Reverse | Δbtb         |
| 3arm-BTB (f)          | GCTTCTACACCGGGAATGAACCTGCTGCTGCAACAAGATGATA  | Forward | Δbtb         |
| 3arm-BTB (r)          | TAAC TAGT CAGACTCATCTGCA                     | Reverse | Δbtb         |
| OL-356052-Neo (f)     | TCCCAATTGT CAGGGGAACAGATACCCAGAGTTATCTCACCAT | Forward | Δ356052      |
| OL-356052-Neo (r)     | GGTAGTTTTGAGAGTACTTTTATTCCCGGTGTAGGAAGCTGTT  | Reverse | Δ356052      |
| 5arm-356052 (f)       | CTGTCTCTAAATTTCTTCGC                         | Forward | Δ356052      |
| 5arm-356052 (r)       | TGAGATAACTCTGGGTATCTGTTCGCCCTGACAATGGGATCAT  | Reverse | Δ356052      |
| 3arm-356052 (f)       | GCTTCTACACCGGGAATGAAGTAGCTCTCAAACCTACCAAAA   | Forward | Δ356052      |
| 3arm-356052 (r)       | AGGCTGACGAGCACACGAATTT                       | Reverse | Δ356052      |
| OL-Adenine-Neo (f)    | CAACTTCATGCCAAGCTGACAGATACCCAGAGTTATCTCACCAT | Forward | Δaprt        |
| OL-Adenine-Neo (r)    | TTAATCATCCCGTATCAGCTCATTCCCGGTGTAGGAAGCTGTT  | Reverse | Δaprt        |
| 5arm- Adenine (f)     | TGCCCAACGACCCGGATTTTG                        | Forward | Δaprt        |
| 5arm- Adenine (r)     | TGAGATAACTCTGGGTATCTGTCAGCTTGGCATGAAGTTGTTTT | Reverse | Δaprt        |
| 3arm- Adenine (f)     | GCTTCTACACCGGGAATGAGCTGATACGGGGATGATTAATGAA  | Forward | Δaprt        |
| 3arm- Adenine (r)     | GTTGGCGGCGCATAGATTGGTG                       | Reverse | Δaprt        |
| OL-Adenylate-Neo (f)  | GGATCCGATCATTATCAGAAGATACCCAGAGTTATCTCACCAT  | Forward | Δac          |
| OL- Adenylate-Neo (r) | ACAAGAAGCAGGTTTTTATTTCATTCCCGGTGTAGGAAGCTGTT | Reverse | Δac          |
| 5arm-Adenylate (f)    | GTACCAGCGGGGCCAGGTT                          | Forward | Δac          |
| 5arm-Adenylate (r)    | TGAGATAACTCTGGGTATCTTCTGATAATGATCGGATCCCGTT  | Reverse | Δac          |
| 3arm-Adenylate (f)    | GCTTCTACACCGGGAATGAATAAAAACCTGCTTCTTTGTACCT  | Forward | Δac          |
| 3arm-Adenylate (r)    | TTGGTCATGCCACGCGGAGGA                        | Reverse | Δac          |
| OL-Hel-Neo (f)        | AACAACAACCACTCACTATCAGATACCCAGAGTTATCTCACCAT | Forward | Δhelicase    |
| OL-Hel-Neo (r)        | AACCAACATGGATGGGCATCTCATTCCCGGTGTAGGAAGCTGTT | Reverse | Δhelicase    |
| 5arm-Hel (f)          | GTACATAGAGTCCTTGAGATG                        | Forward | Δhelicase    |
| 5arm-Hel (r)          | TGAGATAACTCTGGGTATCTTGACAACAACATGGATGGGCATC  | Reverse | Δhelicase    |
| 3arm-Hel (f)          | GCTTCTACACCGGGAATGAGATGCCATCCATGTTGGTTGTCA   | Forward | Δhelicase    |
| 3arm-Hel (r)          | AGAAGGGCGGCGAGGCCAAGAA                       | Reverse | Δhelicase    |
| HpaI-dcl2 (f)         | CGGCCGCAAGCTTGTGGAGGATGGCGTACTATACCG         | Forward | Pcrp:dcl2    |
| HpaI-dcl2 (r)         | AGGTCAAGCATGCGTTAACTATTCTCTCAAATCTCG         | Reverse | Pcrp:dcl2    |
| DEAH-mut (f)          | GCTGCCGACGCGCACTGCAACAAGAATCATGCCT           | Forward | mutDEAD      |
| DEAH-mut (r)          | GTGCGCTGCGGCAGCGAAGACCATGAGCGGAGTGAT         | Reverse | mutDEAD      |
| Hel2-mut (f)          | GCTGCCGACGCGGCTGCCGTGCCTGCTTGCAATCTCATCA     | Forward | mutHel       |
| Hel2-mut (r)          | AGCCGCTGCGGCAGCAACGCTGGTTGCCACGAGCATA        | Reverse | mutHel       |
| RNA3a-mut (f)         | GCTGCCGACGCGGCTAGTATCCTCAAACATGCATTA         | Forward | mutRNase-a   |
| RNA3a-mut (r)         | AGCCGCTGCGGCAGCGTCCCTAGAACTCAATCCTC          | Reverse | mutRNase-a   |
| RNA3b-mut (f)         | GCTGCCGACGCGGCTGCCGCCATTCTCGACTACATCATCG     | Forward | MutRNase-b   |
| RNA3b-mut (r)         | AGCCGCTGCGGCAGCGGCTCGTAGCACGCCACTGTT         | Reverse | MutRNase-b   |
| DSRM-mut (f)          | GCTGCCGACGCGGCTGCCGAAGGCTGGCGGCAGGGAGA       | Forward | mutDSRM      |
| DSRM-mut (r)          | AGCCGCTGCGGCAGCTAGCACATGCACCTGATCCCTC        | Reverse | mutDSRM      |
| HpaI-dcl2Rn (f)       | CGGCCGCAAGCTTGTGGCGAGATGTCGTCCTCATGG         | Forward | Pcrp:Rn dcl2 |
| HpaI-dcl2Rn (r)       | AGGTCAAGCATGCGTTAACTCATCCAGTCAGCATCTCATCC    | Reverse | Pcrp:Rn dcl2 |
| HpaI-dcl2Fg (f)       | CGGCCGCAAGCTTGTATCAGGATGTCCTCAAGCGATA        | Forward | Pcrp:Fg dcl2 |
| HpaI-dcl2Fg (r)       | AGGTCAAGCATGCGTTCTAAATGAGTTCATGGCAACA        | Reverse | Pcrp:Fg dcl2 |

## Supplementary figures

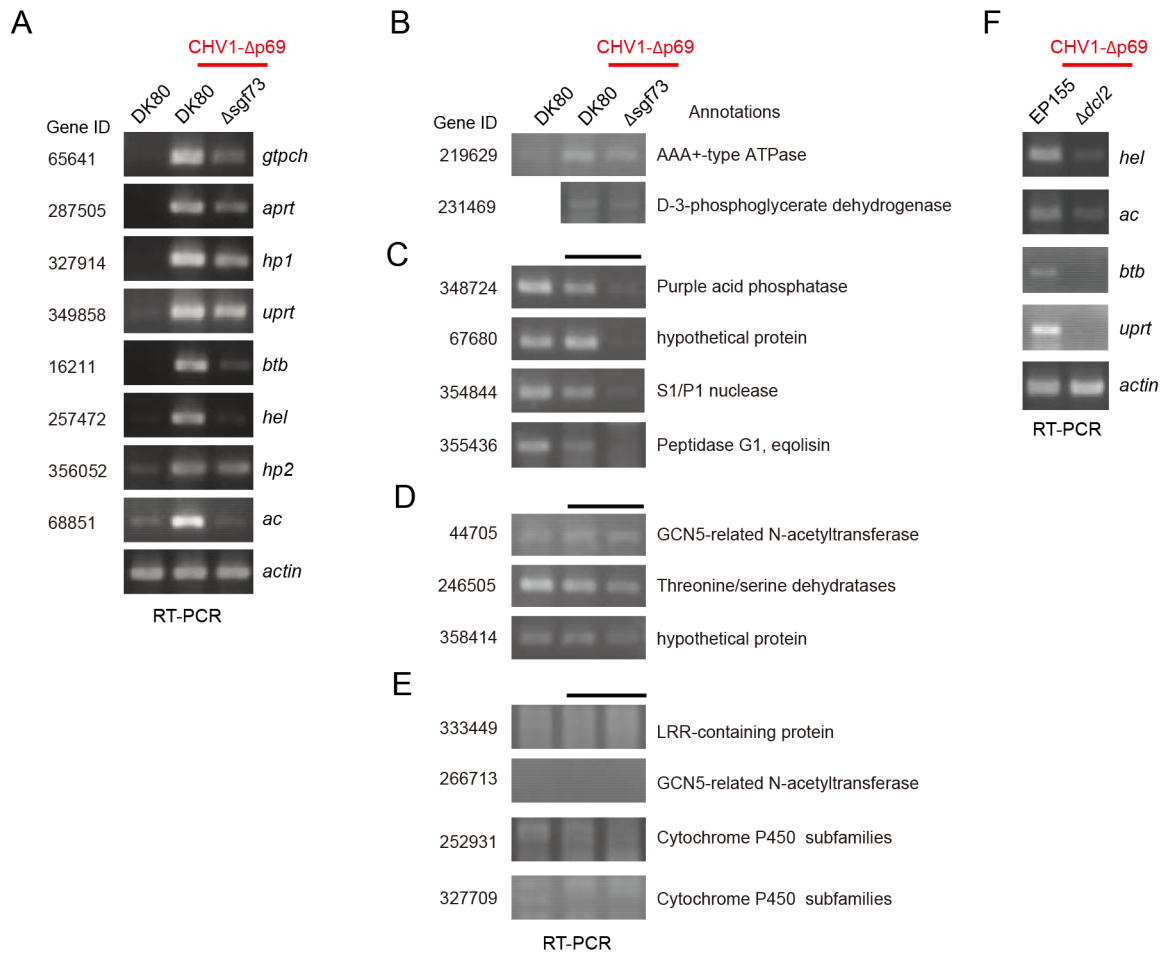

**Fig. S1.** RT-PCR analysis of the transcript accumulation of virus-induced gene candidates (listed in [SI Appendix, Table S1](#)). (A–E) Gene transcript accumulation in virus-free DK80, CHV1- $\Delta$ p69-infected DK80, and  $\Delta$ sgf73 strains. The transcriptional expression pattern of genes that are highly induced by CHV1- $\Delta$ p69 infection in DK80 but less induced in the  $\Delta$ sgf73 strain are shown in A, while the genes with another expression pattern or those undetected are shown in B–E. (F) Gene transcript accumulation in CHV1- $\Delta$ p69-infected EP155 and  $\Delta$ dcl2 strains. The sequences of all primers used are shown in Table S2.

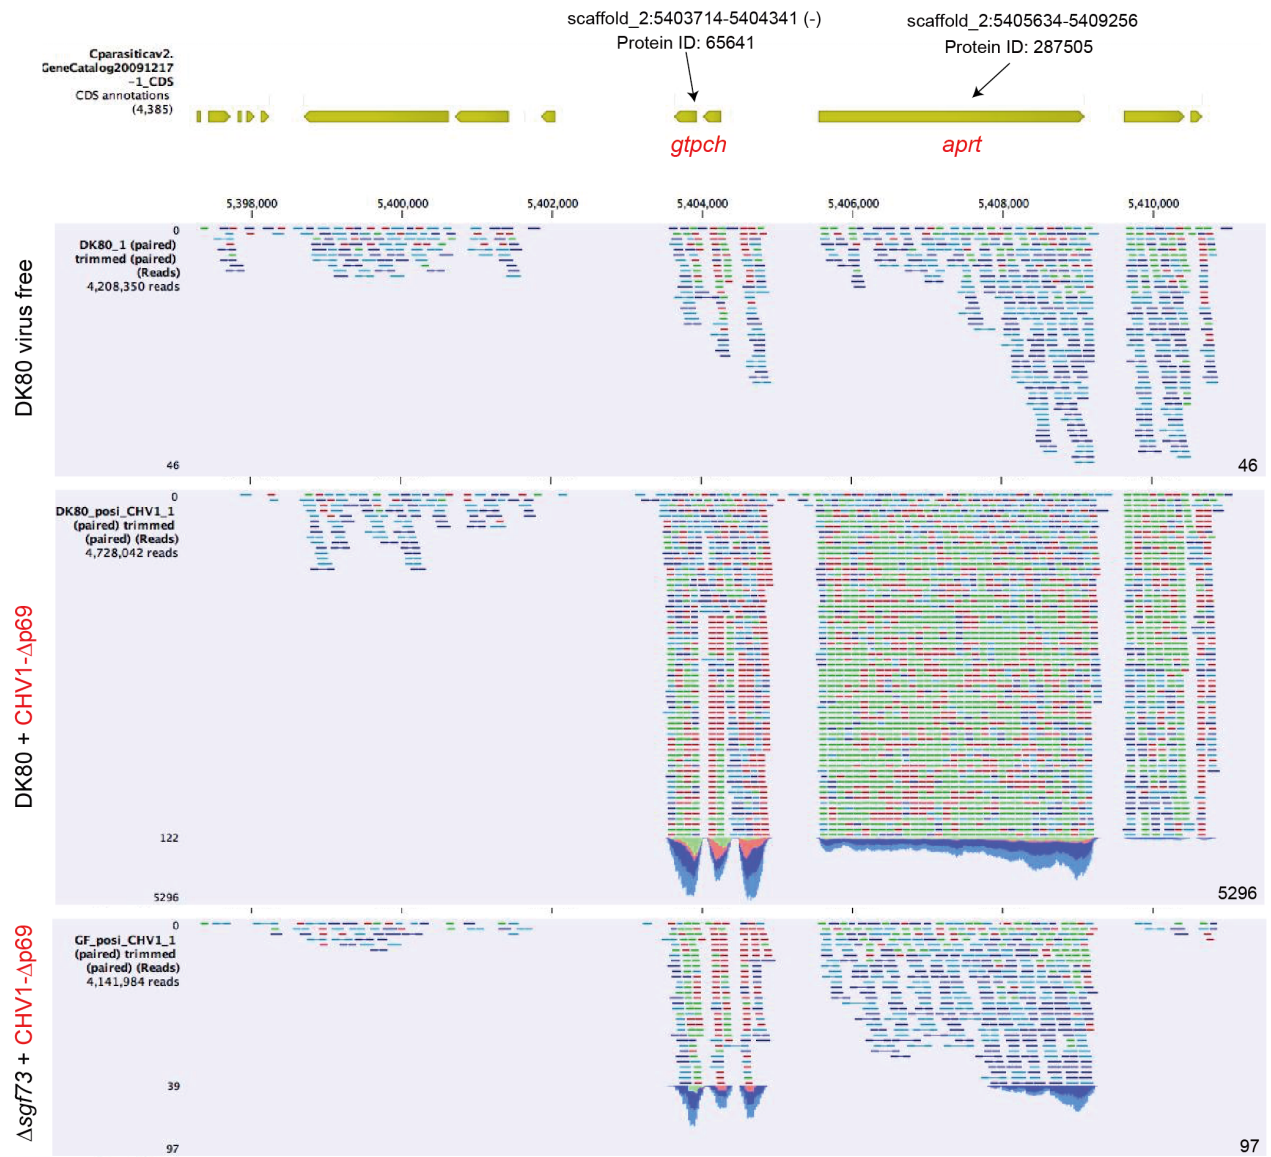

**Fig. S2.** Mapping positions of the *gtpch* and *aprt* genes in the *Cryphonectria parasitica* genome. Sequence reads obtained from RNA-seq analysis of virus-free DK80, CHV1-Δp69-infected DK80, and Δsgf73 samples are shown below the map.

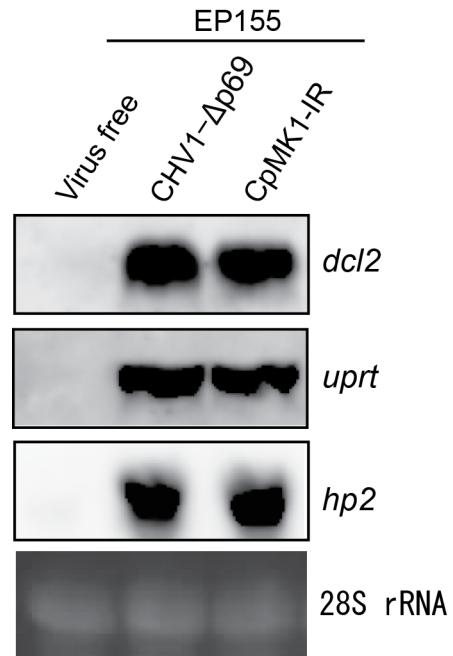

**Fig. S3.** Transcriptional induction of *dcl2*, *uprt*, and *hp2* by transgenic expression of inverted repeats (dsRNA). Total RNA prepared from fungal strains infected (CHV1- $\Delta$ p69) or -uninfected (Virus free) by CHV1- $\Delta$ p69 and expressing an inverted repeat derived from a mitogen activated kinase gene, *CpMK1* (CpMK1-IR) was subjected to Northern blotting as described in [Fig. 1](#). Ethidium bromide-stained 28S rRNA was used as a loading control.

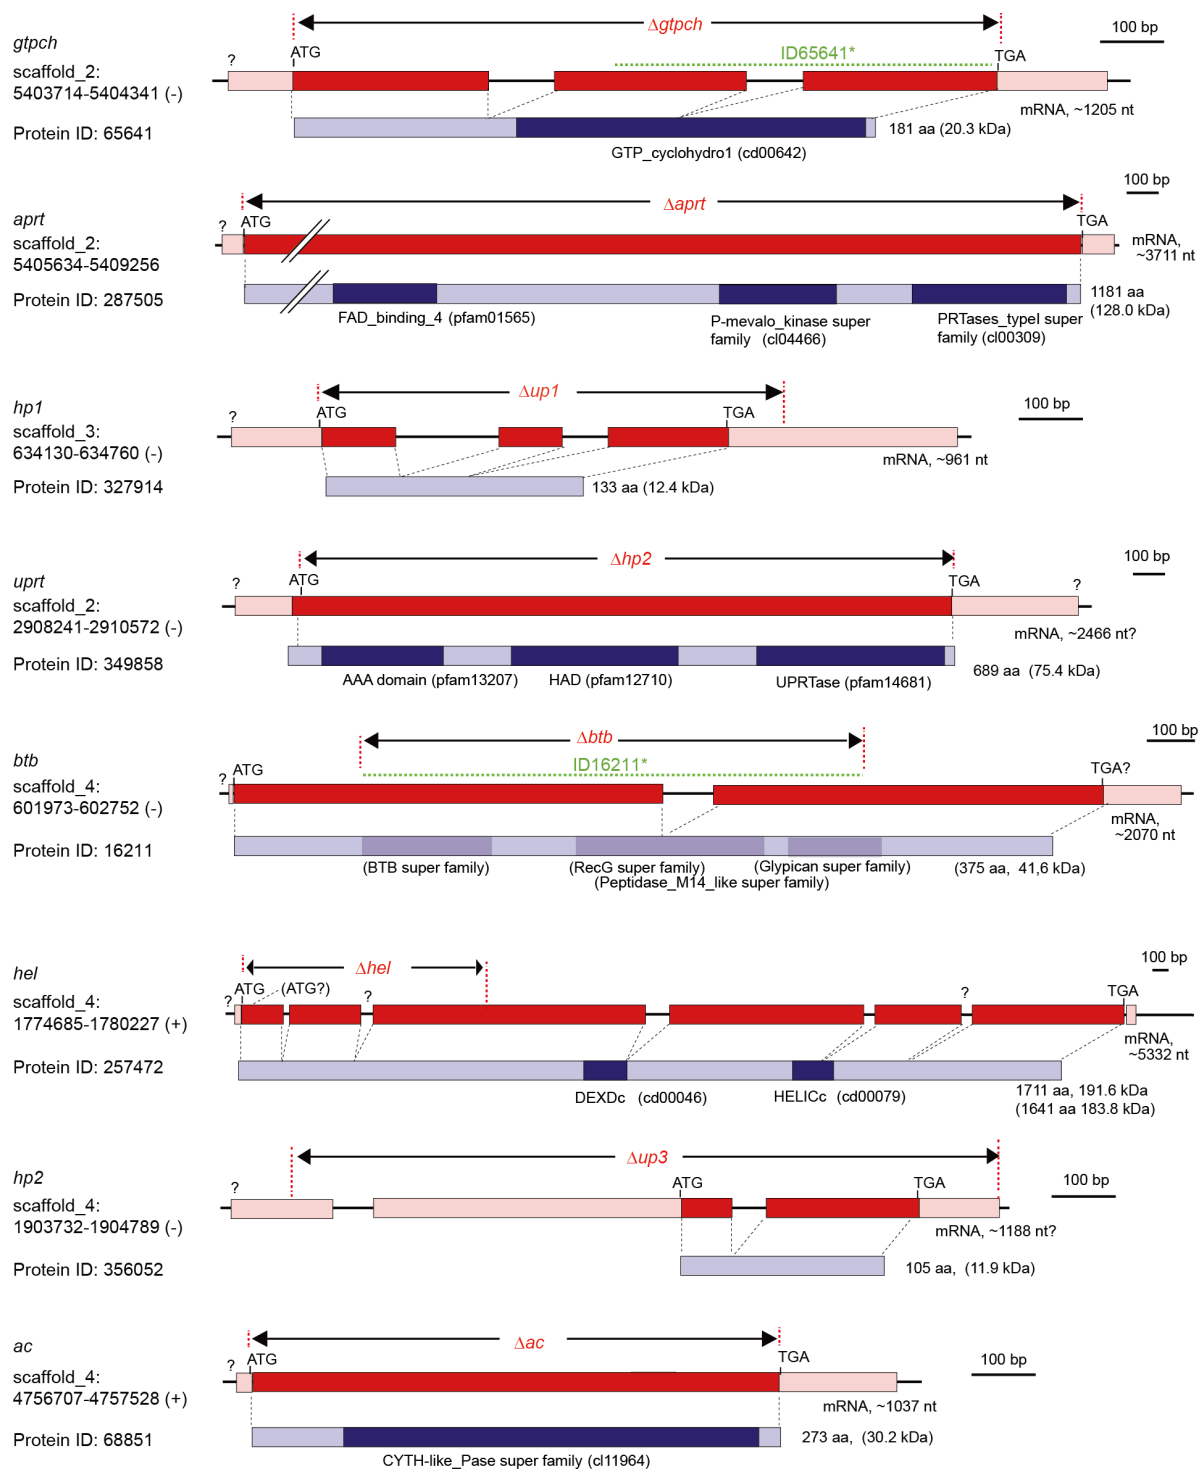

**Fig. S4.** Schematic representation of the selected virus-induced genes, *uprt*, *gtpch*, *aprt*, *hp1*, *hp2*, *btb*, *hel*, and *ac*. Their mapping positions in the *C. parviticum* genome (scaffold), exon/intron maps, protein ID number, protein motifs, and disrupted regions in the deletion mutants (black line with arrow head) are shown.



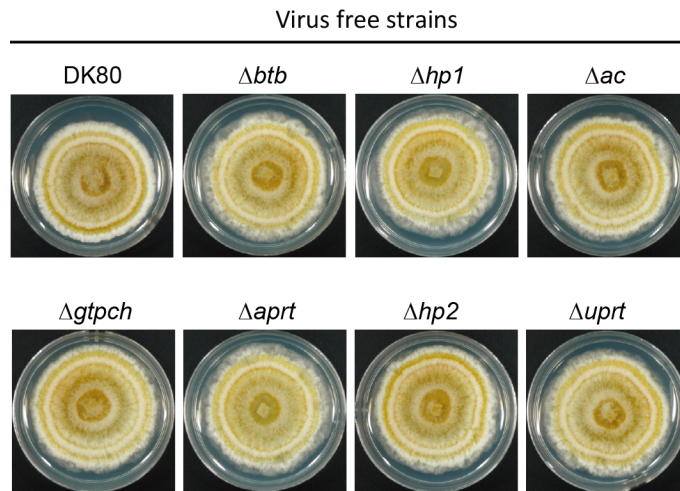

**Fig. S5.** Colony morphology of virus-free DK80 and the disruption mutants ( $\Delta uprt$ ,  $\Delta gtpch$ ,  $\Delta aprt$ ,  $\Delta hp1$ ,  $\Delta hp2$ ,  $\Delta btb$ ,  $\Delta hel$ , and  $\Delta ac$ ) of *C. parasitica* on PDA plates. Fungal strains were grown on PDA for 5 days and photographed.

A

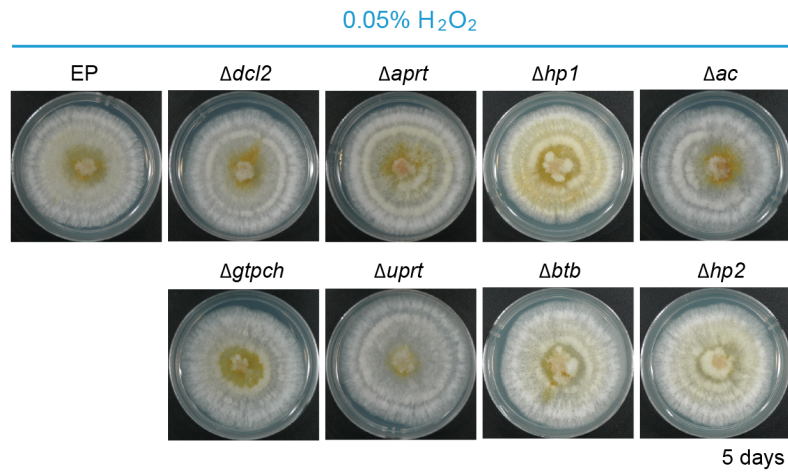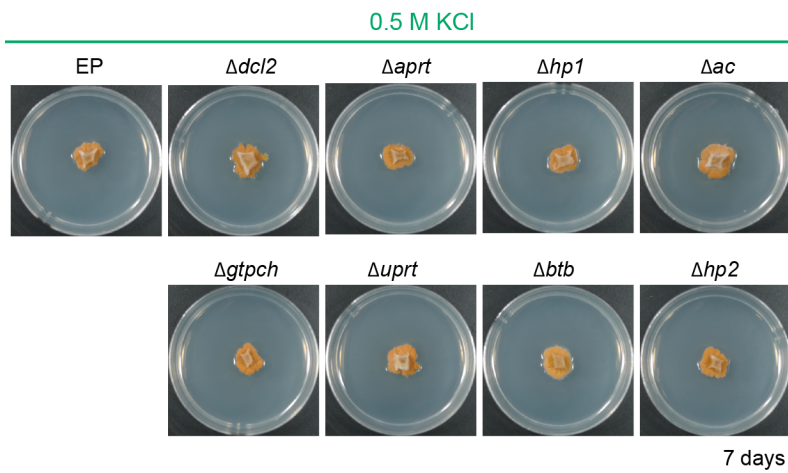

B

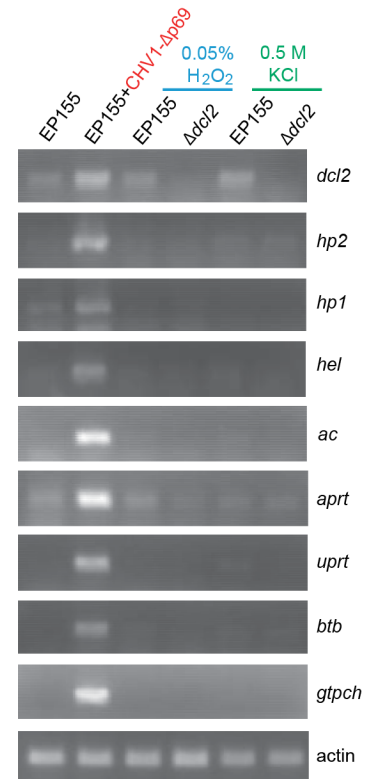

**Fig. S6.** Effect of oxidative and osmotic stresses on fungal growth and gene transcriptional induction. (A) Phenotype of the EP155 (EP) and DK80 disruption mutant strains ( $\Delta uprt$ ,  $\Delta gtpch$ ,  $\Delta aprt$ ,  $\Delta hp1$ ,  $\Delta hp2$ ,  $\Delta btb$ ,  $\Delta hel$ , and  $\Delta ac$ ) on PDA medium containing 0.05% H<sub>2</sub>O<sub>2</sub> or 0.5 M KCl. (B) RT-PCR analysis of gene transcriptional induction in fungal strains (EP155 and  $\Delta dcl2$ ) with or without CHV1- $\Delta p69$  infection under oxidative (0.05% H<sub>2</sub>O<sub>2</sub>) or osmotic (0.5 M KCl) stress. The constitutive *actin* gene was used as an internal control.

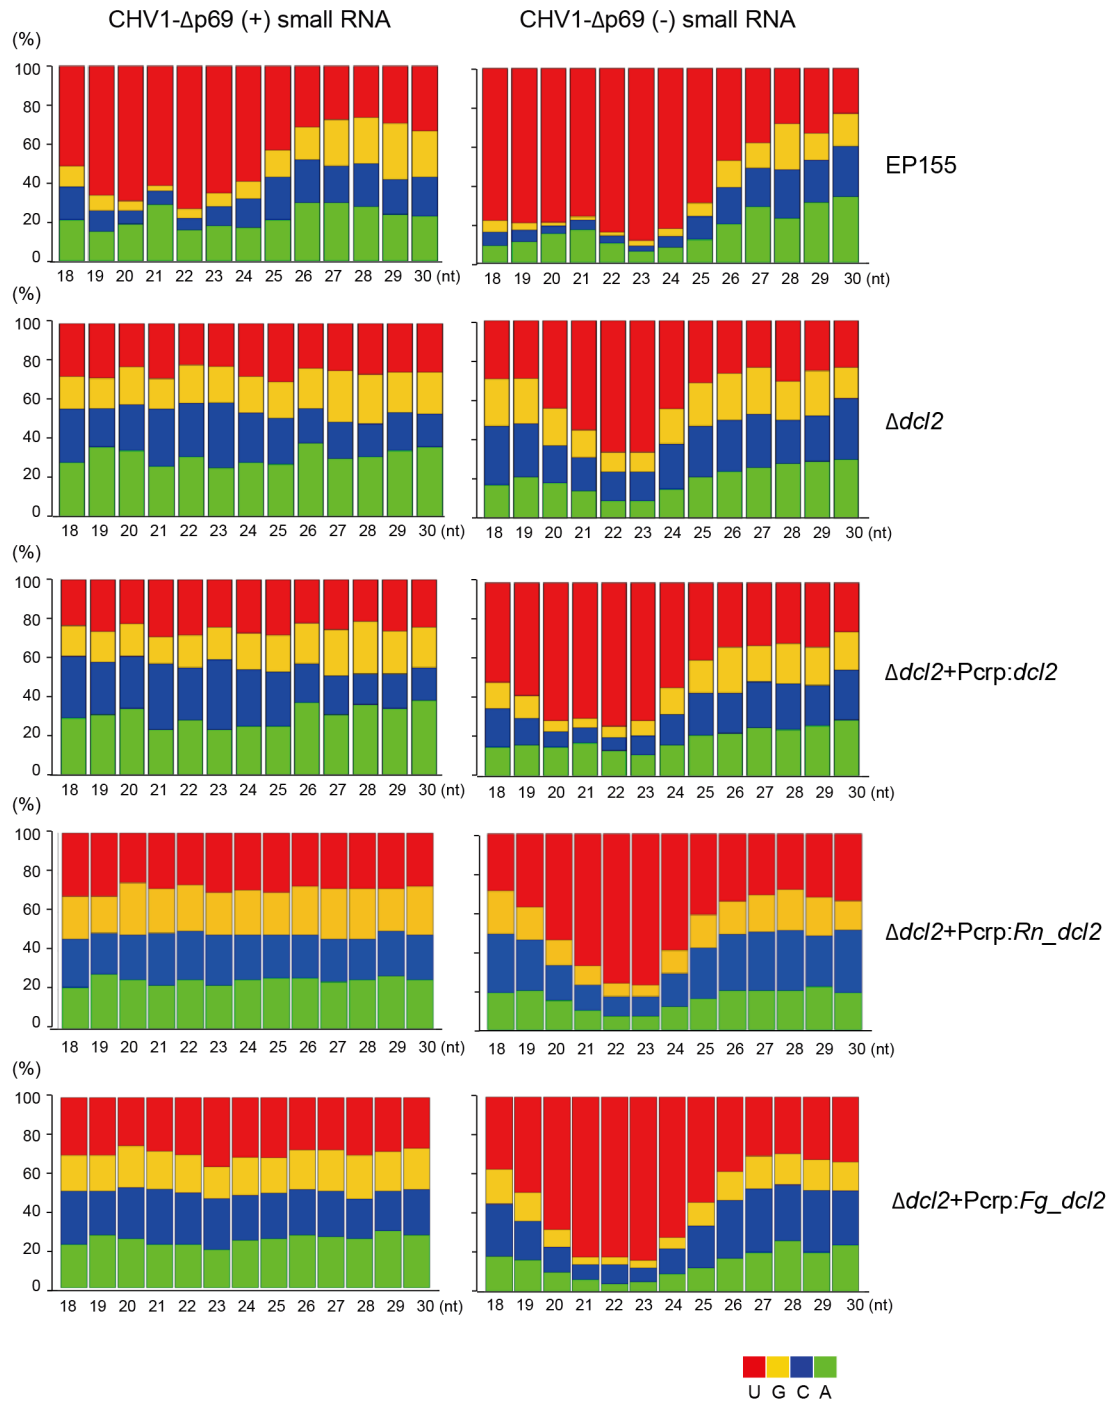

**Fig. S7.** 5'-terminal nucleotide profile of CHV1- $\Delta$ p69-derived small RNAs from EP155,  $\Delta$ dcl2 (non-complemented), and  $\Delta$ dcl2 expressing homologous (*Pcrp:dcl2*) or heterologous DCL2 proteins from *Rosellinia necatrix* (*Pcrp:Rn\_dcl2*) and *Fusarium graminearum* (*Pcrp:Fg\_dcl2*). Red, dark yellow, blue and green regions denote small RNAs with 5'-terminal nucleotides U, G, C, and A, respectively.

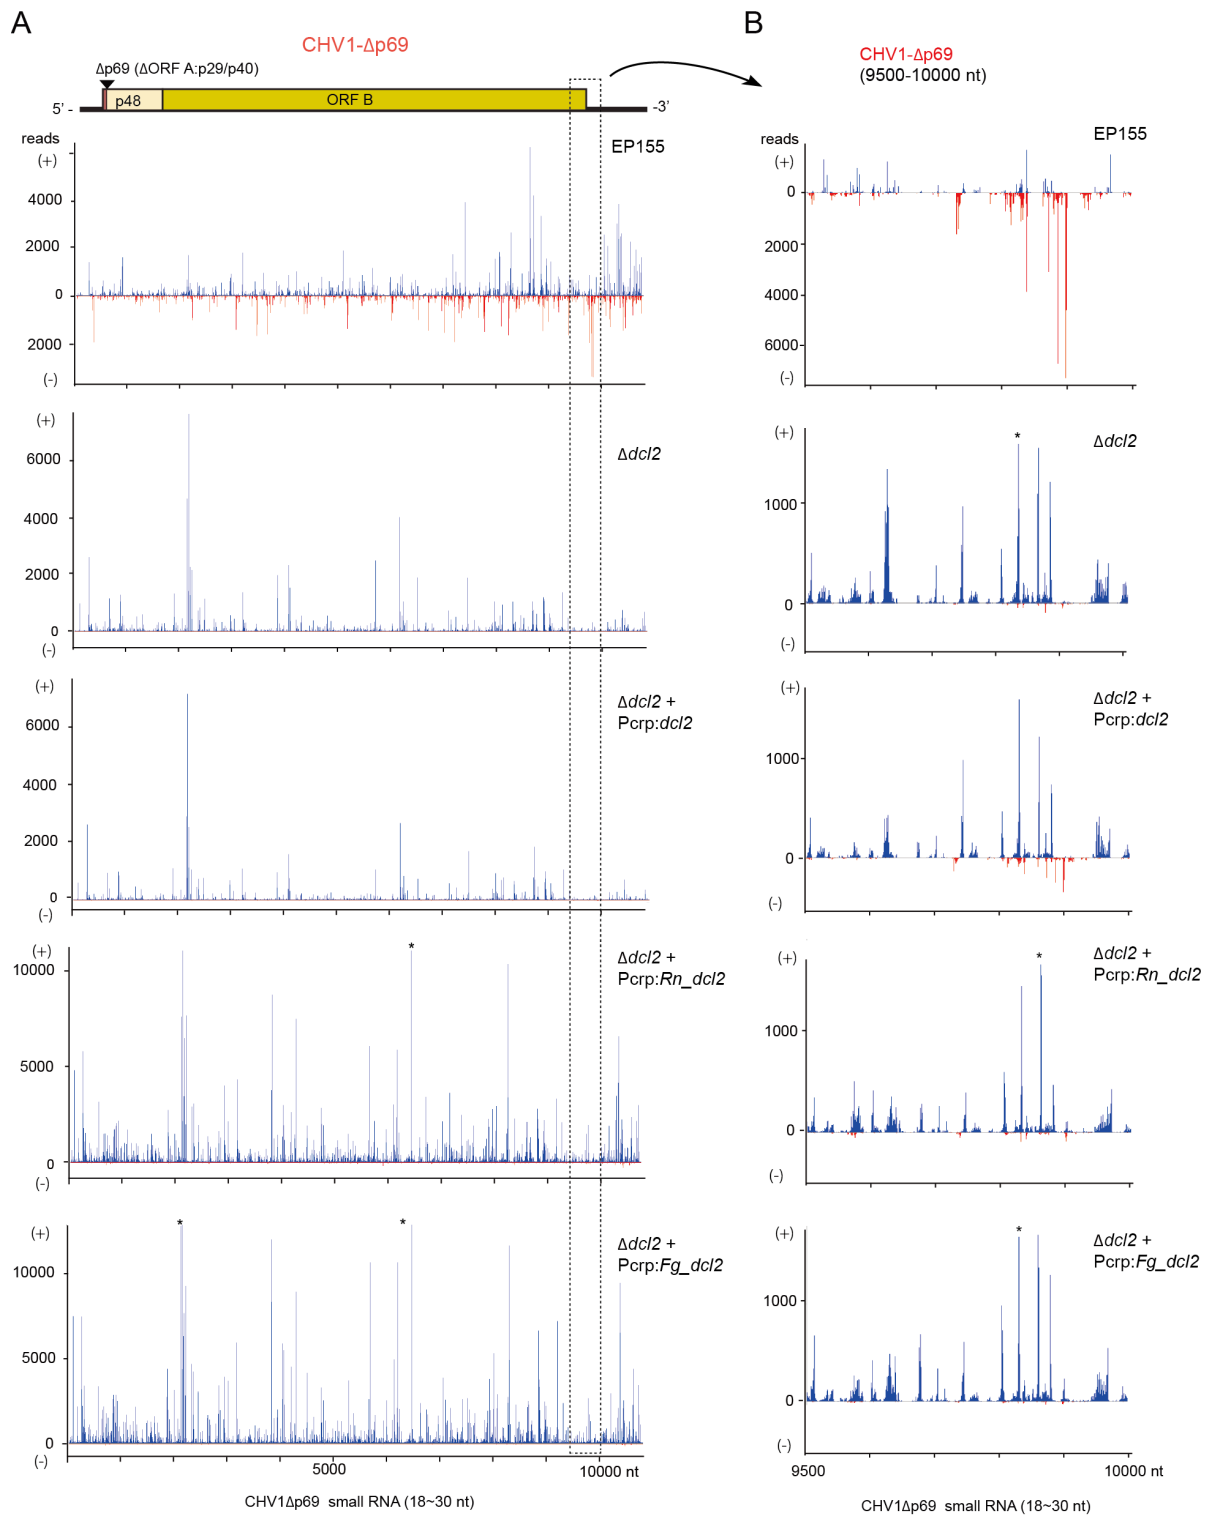

**Fig. S8.** Distribution of CHV1- $\Delta$ p69-derived small RNAs (18–30 nt) across the viral genome. (A) Distribution map of the full-length CHV1- $\Delta$ p69 genome. (B) Close-up view of small RNA distribution in a partial genome sequence (ranging 9,500–10,000 nt).



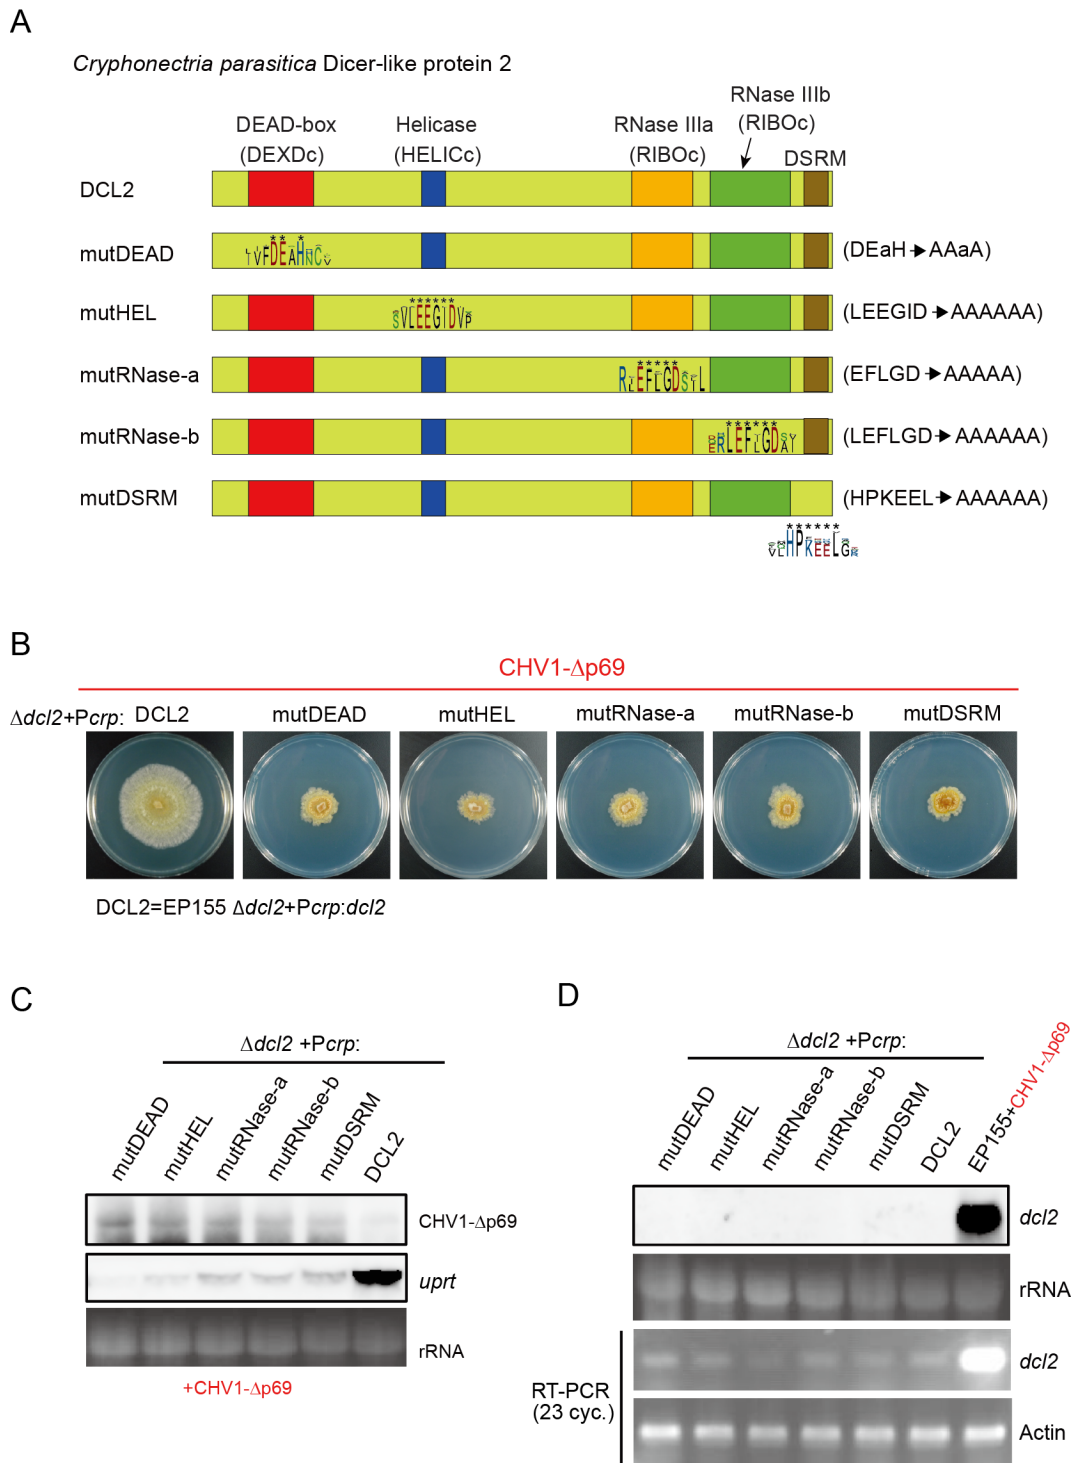

**Fig. S10.** Effect of mutations in protein motifs on *C. parasitica* DCL2 function. (A) Schematic diagrams showing alanine substitutions at conserved amino acid positions in helicase (DEAD-box and Helicase), ribonuclease III (RNase IIIa and IIIb, RIBOc), and dsRNA binding (DSRM) motifs in the *C. parasitica* DCL2 protein. Wild-type DCL2 is shown on the top and mutants are denoted below it. Amino acid changes in each mutant are indicated at the right. (B) Phenotype of  $\Delta dcl2$  complemented with the *dcl2* wild-type

(DCL2) mutant constructs (mutDEAD, mutHEL, mutRNase-a, mutRNase-b and mutDSRM) described in A. The colonies were cultured for 7 days on PDA and photographed. (C) Northern blotting analysis of the CHV1- $\Delta$ p69 RNA genome and *uprt* gene transcript accumulation in the fungal strains shown in B. (D) Northern blotting and RT-PCR analyses of *dcl2* transcripts in the wild-type (DCL2) and  $\Delta$ *dcl2* complemented with the *dcl2* mutant constructs. Northern blotting was carried out as described in the Material and Method, while RT-PCR was performed using a primer pair, Dcl2-C. *parasitica*(f) and Dcl2-C. *parasitica*(r), Table S2).

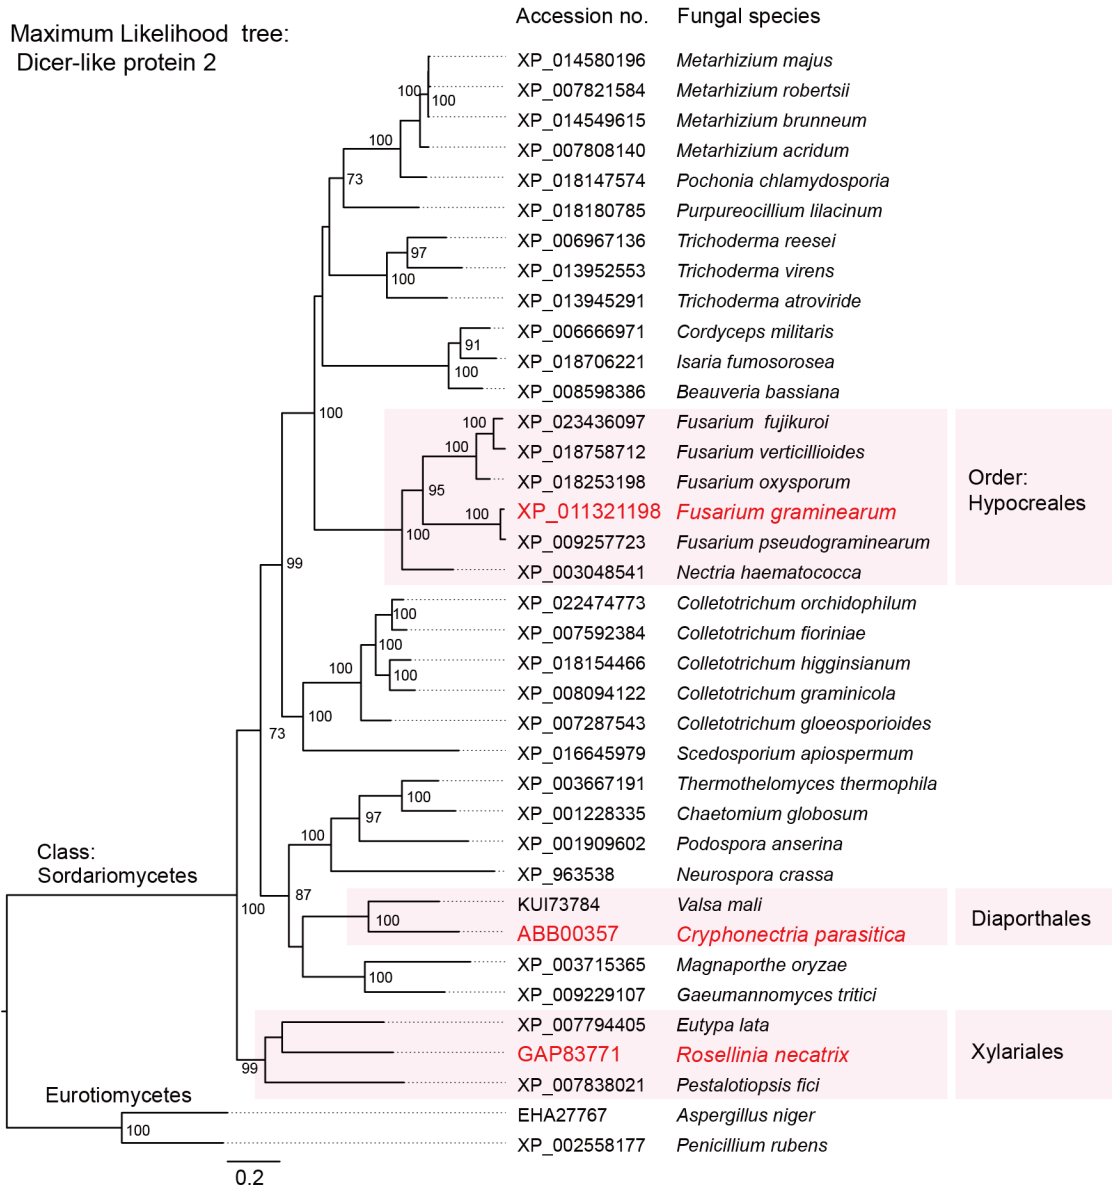

**Fig. S11.** Phylogenetic analysis of DCL2 proteins encoded by *C. parasitica* (order *Diaporthales*), *Rosellinia necatrix* (order *Xylariales*), *F. graminearum* (order *Hypocreales*) and different other fungi genomes. Fungal species names and database accession numbers of DCL2 proteins are indicated in the tree. The numbers at the nodes are bootstrap values of >70%.



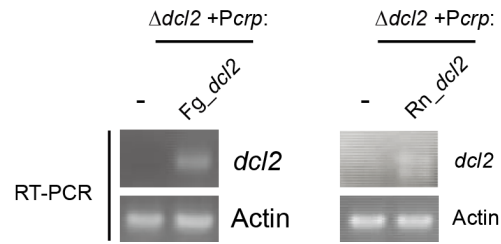

**Fig. S12.** RT-PCR of heterologous *dcl2* in *C. parasitica*  $\Delta dcl2$ .  $\Delta dcl2$  complemented with the heterologous *dcl2* genes from *F. graminearum* or *R. necatrix* are described in the Fig. S7 legend. Transgenic expression of the heterologous *dcl2* was confirmed by RT-PCR using primer sets, Dcl2-F. *graminearum*(f) and Dcl2-F. *graminearum*(r), and Dcl2-R. *necatrix*(f) and Dcl2-R. *necatrix*(r). See Table S2 for the primers' sequences.

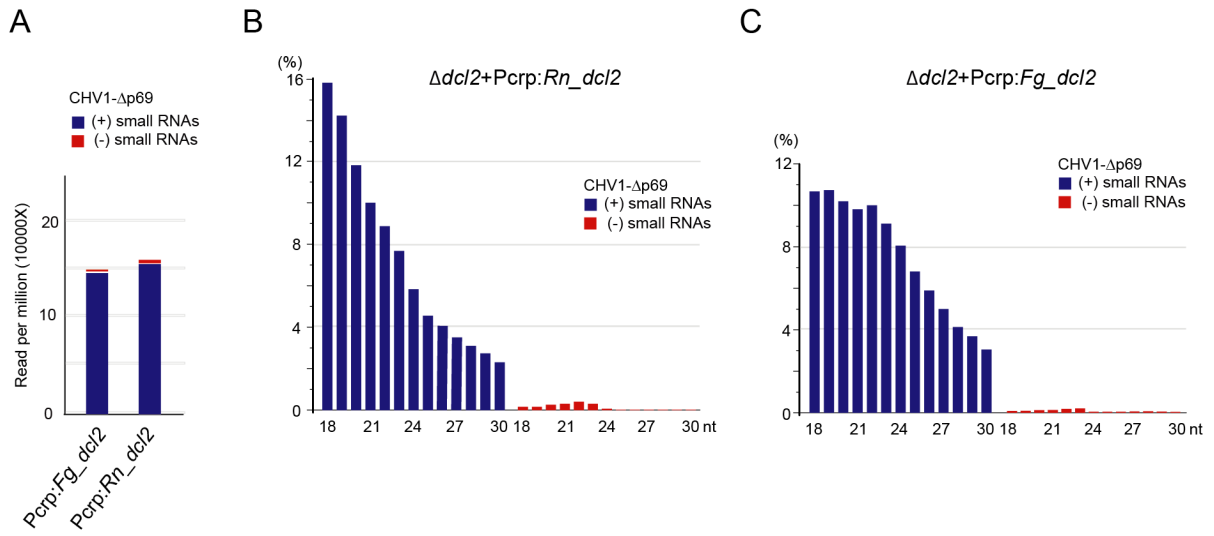

**Fig. S13.** Abundance (A) and size distribution (B) of CHV1- $\Delta$ p69-derived small RNAs in *C. parasitica*  $\Delta$ dcl2 complemented with DCL2 from *R. necatrix* (+Pcrp:Rn\_dcl2) or *F. graminearum* (+Pcrp:Fg\_dcl2).
